# Supplementary material for: A multi-functional composite nitrogen carrier for ammonia production via a chemical looping route
Source: Royal Society of Chemistry journal article supplement (doi:10.1039/d0ta10519h), 2020-11-27
Supplement: d0ta10519h1.pdf [file d0ta10519h1.pdf]

# Supporting Information

## **Multi-functional composite nitrogen carrier for ammonia production via chemical looping route**

Sheng Feng, <sup>† ab</sup> Wenbo Gao, <sup>† b</sup> Qianru Wang, <sup>b</sup> Yeqin Guan, <sup>b</sup> Hanxue Yan, <sup>b</sup> Han Wu, <sup>b</sup> Hujun Cao, <sup>\* b</sup>  
Jianping Guo<sup>\* b</sup> and Ping Chen<sup>ab</sup>

a. Zhang Dayu School of Chemistry, Dalian University of Technology, Dalian, China.

b. Dalian National Laboratory for Clean Energy, State Key Laboratory of Catalysis, Collaborative Innovation Center of Chemistry for Energy Materials, Dalian Institute of Chemical Physics, Chinese Academy of Sciences, Dalian, China.

† These authors have contributed equally.

\*e-mail: [guojianping@dicp.ac.cn](mailto:guojianping@dicp.ac.cn) and [caohujun@dicp.ac.cn](mailto:caohujun@dicp.ac.cn)

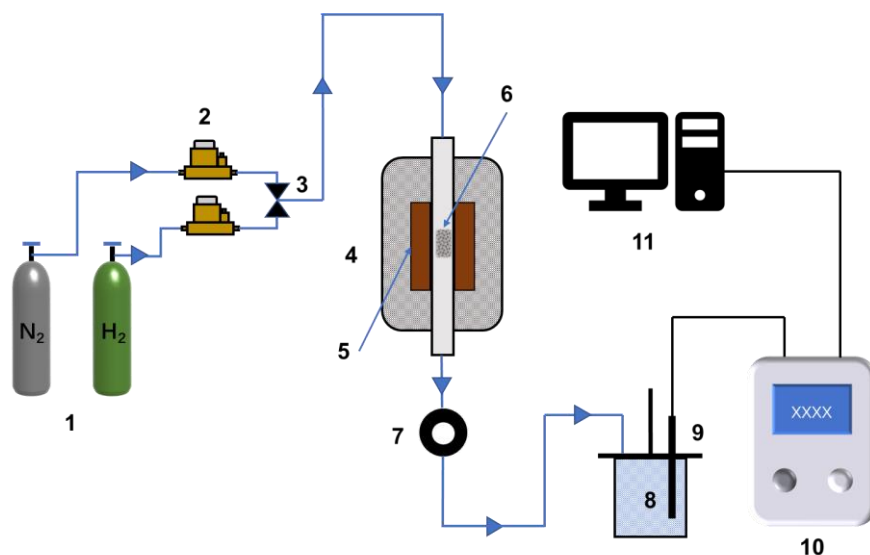

**Fig. S1.** The diagram of evaluation system for chemical looping ammonia synthesis. 1:gas cylinder, 2:mass flowmeter, 3: four-way valve, 4: reactor, 5: heating block, 6: N carrier materials, 7: counterbalance valve, 8: diluted sulfuric acid solution, 9: electrode, 10: conductivity meter, 11: computer.

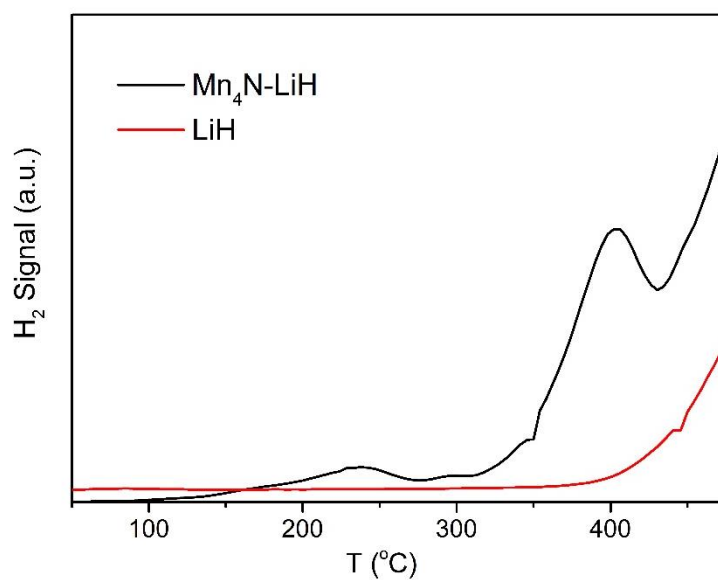

**Fig. S2.**  $N_2$ -TPR-MS profiles of  $LiH$  and  $Mn_4N-LiH$  samples.  $N_2$  flow rate – 30 ml  $min^{-1}$ , ramping rate – 5  $^{\circ}C min^{-1}$ . The data of  $LiH$  was taken from ref. <sup>1</sup>.

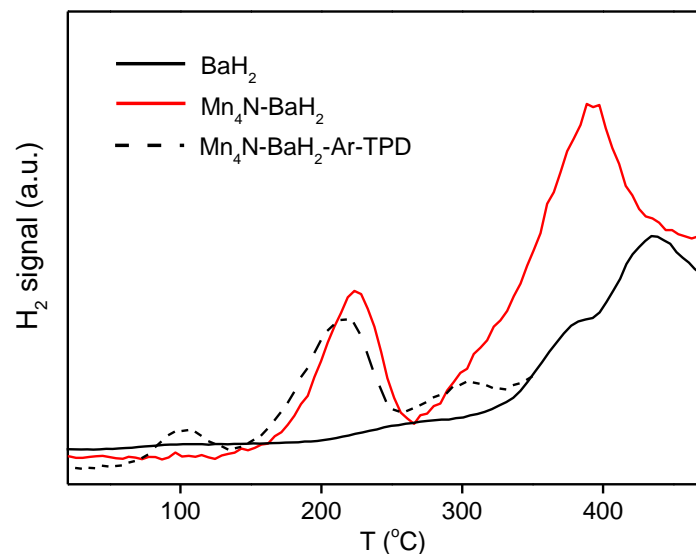

**Fig. S3.**  $\text{N}_2$ -TPR-MS profiles of  $\text{BaH}_2$  and  $\text{Mn}_4\text{N-BaH}_2$  samples (solid lines), and Ar-TPD-MS profile of  $\text{Mn}_4\text{N-BaH}_2$  (dashed line). It is clearly seen that the reaction of  $\text{N}_2$  and  $\text{BaH}_2$  is much easier with the presence of  $\text{Mn}_4\text{N}$ . The  $\text{N}_2$ -TPR-MS profile of  $\text{Mn}_4\text{N-BaH}_2$  shows two apparent  $\text{H}_2$  peaks which are centered around 220 and 390 °C, respectively. By comparing with Ar-TPD-MS profile, it could be concluded that the  $\text{H}_2$  peak at around 220 °C corresponds to the interaction between  $\text{Mn}_4\text{N}$  and  $\text{BaH}_2$ . The peak around 390 °C is mainly due to the fixation of  $\text{N}_2$ , which is at least 50 °C lower than that of  $\text{BaH}_2$ .  $\text{N}_2$  or Ar flow rate – 30 ml  $\text{min}^{-1}$ , ramping rate – 5 °C  $\text{min}^{-1}$ . The data of  $\text{BaH}_2$  were taken from ref. <sup>1</sup>.

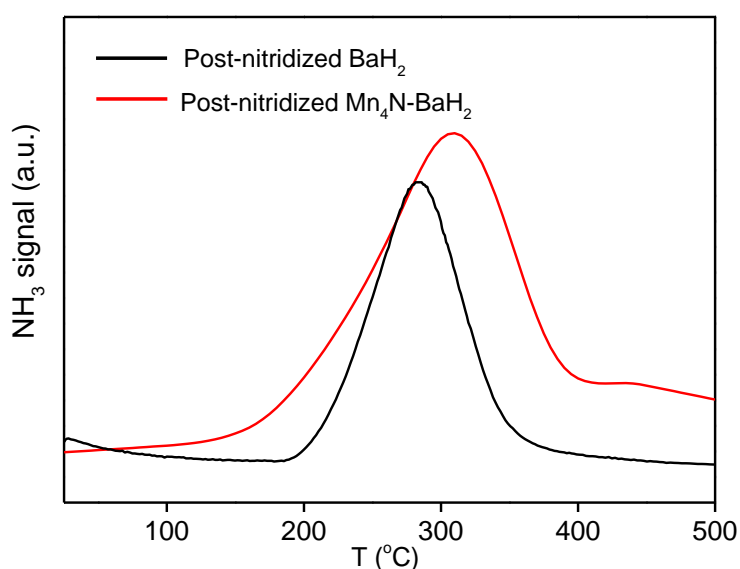

**Fig. S4.**  $\text{H}_2$ -TPR-MS profiles of post-nitridized  $\text{BaH}_2$  (i.e.,  $\text{BaNH}$ ) and  $\text{Mn}_4\text{N-BaH}_2$  samples.  $\text{H}_2$  flow rate – 30 ml  $\text{min}^{-1}$ , ramping rate – 5 °C  $\text{min}^{-1}$ . The data of  $\text{BaH}_2$  was taken from ref. <sup>1</sup>.

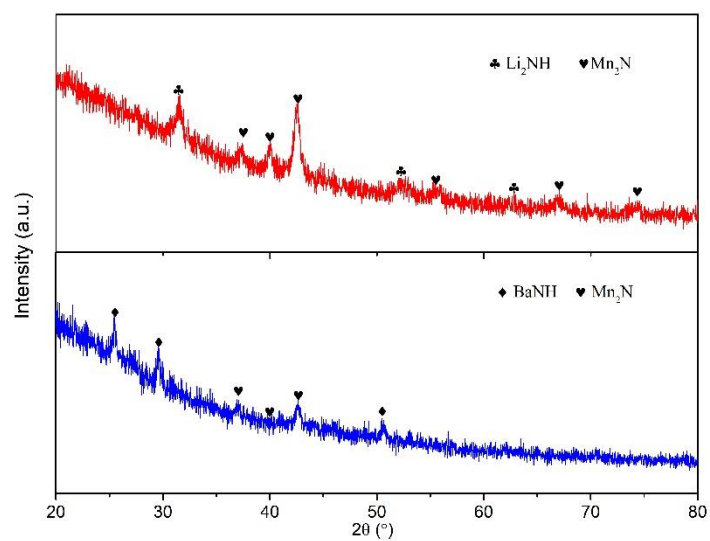

**Fig. S5.** XRD patterns of  $\text{Mn}_4\text{N}$ -LiH and  $\text{Mn}_4\text{N}$ -BaH<sub>2</sub> samples collected after second nitridation step.

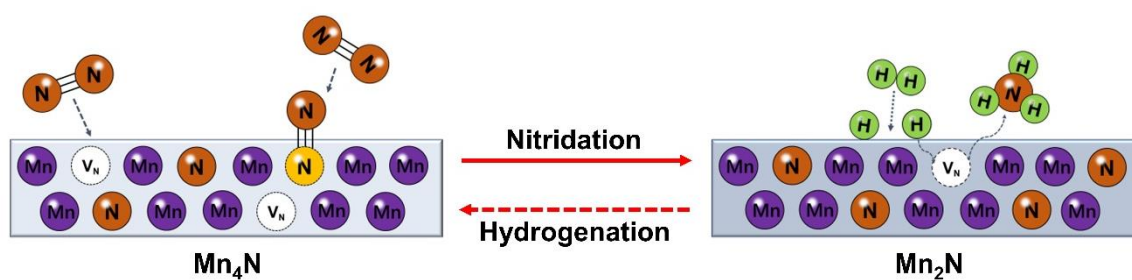

**Fig. S6.** Schematic diagram of CLAS mediated by Mn nitride. The nitrogen vacancies ( $V_N$ ) may function as the active site for the activation and dissociation of  $\text{N}_2$  molecules.

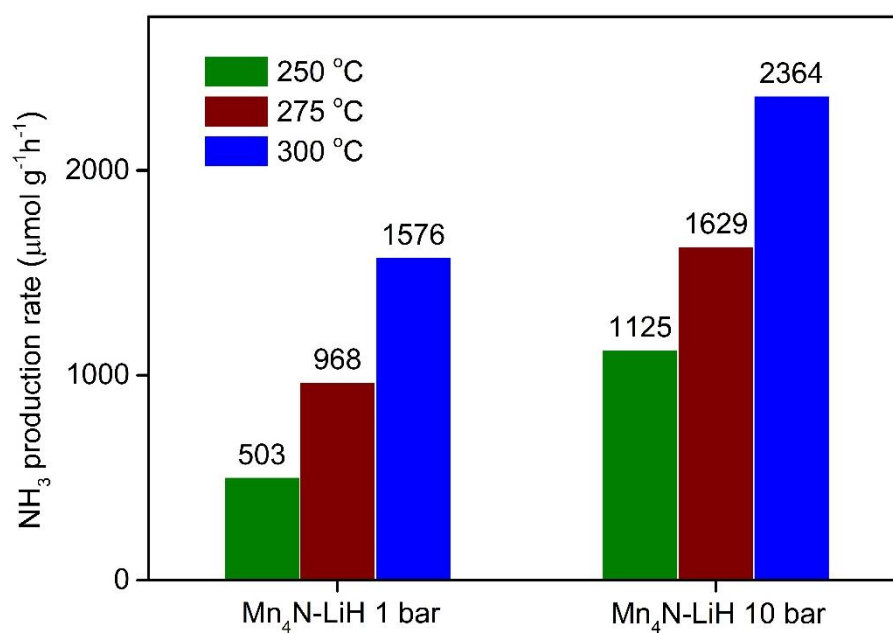

**Fig. S7.**  $\text{NH}_3$  production rates of  $\text{Mn}_4\text{N-LiH}$  under 1 bar and 10 bar of pressure, respectively. Reaction conditions:  $\text{WHSV} = 60000 \text{ ml g}^{-1} \text{ h}^{-1}$ .

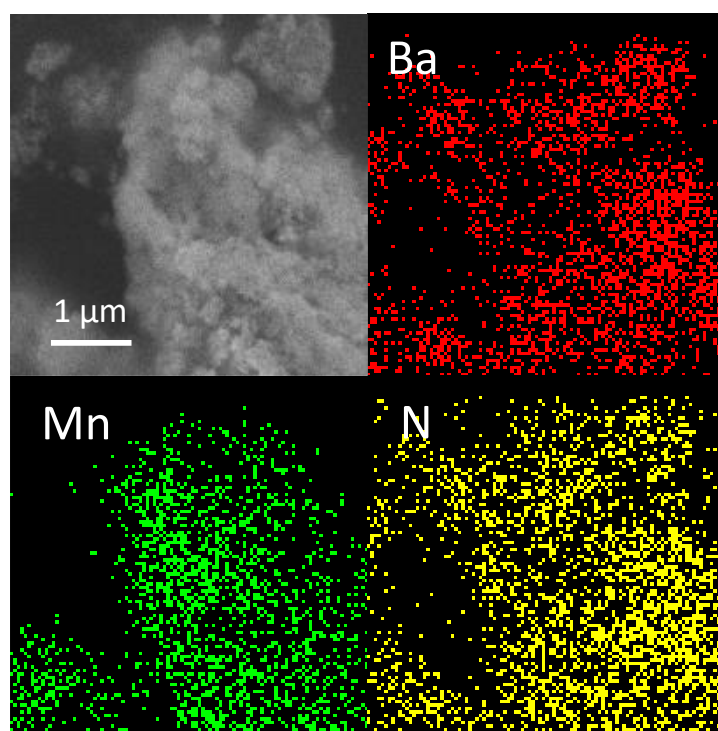

**Fig. S8.** SEM and elemental mapping images of the nitridized  $\text{Mn}_4\text{N-BaH}_2$  sample.

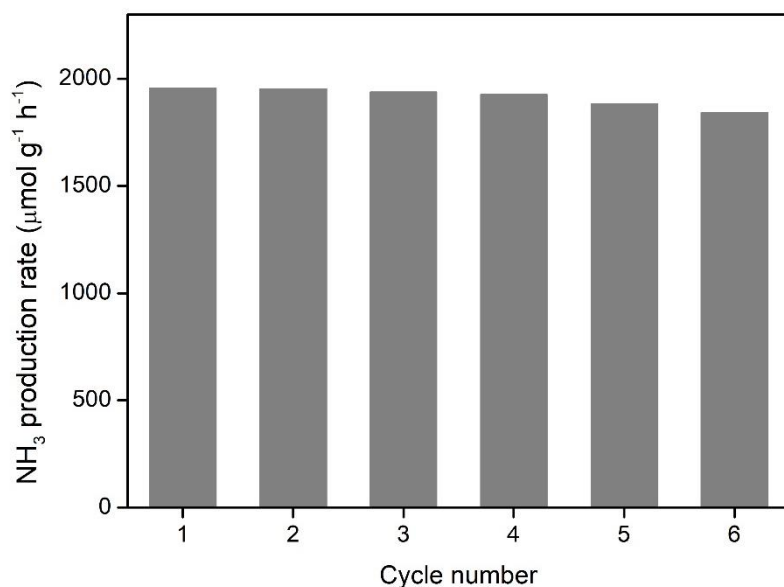

**Fig. S9.** Cyclic test of Mn<sub>4</sub>N-BaH<sub>2</sub> sample for chemical looping ammonia synthesis at 275 °C and 1 bar of N<sub>2</sub> and H<sub>2</sub>.

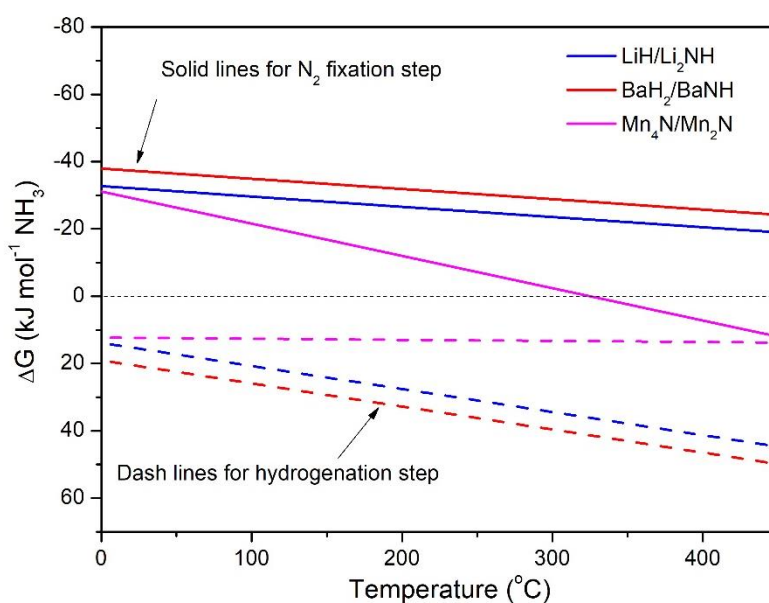

**Fig. S10.** Thermodynamic analyses of N<sub>2</sub> fixation and hydrogenation steps for LiH/Li<sub>2</sub>NH, BaH<sub>2</sub>/BaNH and Mn<sub>4</sub>N/Mn<sub>2</sub>N pairs. The solid lines are the temperature dependences of  $\Delta G$  for N<sub>2</sub> fixation over BaH<sub>2</sub>, LiH and Mn<sub>4</sub>N forming BaNH, Li<sub>2</sub>NH and Mn<sub>2</sub>N, respectively. The dashed lines are the temperature dependences of  $\Delta G$  for hydrogenation of BaNH, Li<sub>2</sub>NH and Mn<sub>2</sub>N. The entropies of solids are not considered. The thermodynamic data used in this figure are given in Tables S1 and S2.

**Table S1.** Thermodynamic calculations of the nitridation of AH and Mn<sub>4</sub>N. The entropies of solids are not considered. The standard enthalpies of formation ( $\Delta_f H^\circ$ ) of Li<sub>2</sub>NH (ref.<sup>2</sup>) and BaNH (ref.<sup>3</sup>) are taken from the literatures. The standard enthalpies of formation of other substances are taken from “NIST Standard Reference Database Number 69”.<sup>4</sup>

| Reaction                                            | 2LiH  | + | 1/2N <sub>2</sub> | → | Li <sub>2</sub> NH | + | 1/2H <sub>2</sub> | $\Delta_r H^\circ$<br>(kJ mol <sup>-1</sup> ) | $\Delta_r S^\circ$<br>(J mol <sup>-1</sup> K <sup>-1</sup> ) |
|-----------------------------------------------------|-------|---|-------------------|---|--------------------|---|-------------------|-----------------------------------------------|--------------------------------------------------------------|
| $\Delta_f H^\circ$<br>(kJ mol <sup>-1</sup> )       | -90.5 |   | 0                 |   | -222               |   | 0                 | -41                                           | ---                                                          |
| $S^\circ$<br>(J mol <sup>-1</sup> K <sup>-1</sup> ) | ---   |   | 191.6             |   | ---                |   | 130.7             | ---                                           | -30.5                                                        |

  

| Reaction                                            | BaH <sub>2</sub> | + | 1/2N <sub>2</sub> | → | BaNH   | + | 1/2H <sub>2</sub> | $\Delta_r H^\circ$<br>(kJ mol <sup>-1</sup> ) | $\Delta_r S^\circ$<br>(J mol <sup>-1</sup> K <sup>-1</sup> ) |
|-----------------------------------------------------|------------------|---|-------------------|---|--------|---|-------------------|-----------------------------------------------|--------------------------------------------------------------|
| $\Delta_f H^\circ$<br>(kJ mol <sup>-1</sup> )       | -178.7           |   | 0                 |   | -224.9 |   | 0                 | -46.2                                         | ---                                                          |
| $S^\circ$<br>(J mol <sup>-1</sup> K <sup>-1</sup> ) | ---              |   | 191.6             |   | ---    |   | 130.7             | ---                                           | -30.5                                                        |

  

| Reaction                                            | Mn <sub>4</sub> N | + | 1/2N <sub>2</sub> | → | 2Mn <sub>2</sub> N | $\Delta_r H^\circ$<br>(kJ mol <sup>-1</sup> ) | $\Delta_r S^\circ$<br>(J mol <sup>-1</sup> K <sup>-1</sup> ) |
|-----------------------------------------------------|-------------------|---|-------------------|---|--------------------|-----------------------------------------------|--------------------------------------------------------------|
| $\Delta_f H^\circ$<br>(kJ mol <sup>-1</sup> )       | -128.7            |   | 0                 |   | -93                | -57.3                                         | ---                                                          |
| $S^\circ$<br>(J mol <sup>-1</sup> K <sup>-1</sup> ) | 0                 |   | 191.6             |   | 0                  | ---                                           | -95.8                                                        |

**Table S2.** Thermodynamic calculations of the hydrogenation of ANH and Mn<sub>2</sub>N. The entropies of solids are not considered.

| Reaction                                            | Li <sub>2</sub> NH | + | 2H <sub>2</sub> | → | 2LiH  | + | NH <sub>3</sub> | $\Delta_r H^\circ$<br>(kJ mol <sup>-1</sup> ) | $\Delta_r S^\circ$<br>(J mol <sup>-1</sup> K <sup>-1</sup> ) |
|-----------------------------------------------------|--------------------|---|-----------------|---|-------|---|-----------------|-----------------------------------------------|--------------------------------------------------------------|
| $\Delta_f H^\circ$<br>(kJ mol <sup>-1</sup> )       | -222               |   | 0               |   | -90.5 |   | -45.9           | -4.9                                          | ---                                                          |
| $S^\circ$<br>(J mol <sup>-1</sup> K <sup>-1</sup> ) | ---                |   | 130.7           |   | ---   |   | 192.8           | ---                                           | -68.6                                                        |

  

| Reaction                                            | BaNH   | + | 2H <sub>2</sub> | → | BaH <sub>2</sub> | + | NH <sub>3</sub> | $\Delta_r H^\circ$<br>(kJ mol <sup>-1</sup> ) | $\Delta_r S^\circ$<br>(J mol <sup>-1</sup> K <sup>-1</sup> ) |
|-----------------------------------------------------|--------|---|-----------------|---|------------------|---|-----------------|-----------------------------------------------|--------------------------------------------------------------|
| $\Delta_f H^\circ$<br>(kJ mol <sup>-1</sup> )       | -224.9 |   | 0               |   | -178.7           |   | -45.9           | 0.3                                           | ---                                                          |
| $S^\circ$<br>(J mol <sup>-1</sup> K <sup>-1</sup> ) | ---    |   | 130.7           |   | ---              |   | 192.8           | ---                                           | -68.6                                                        |

  

| Reaction                                            | 2Mn <sub>2</sub> N | + | 3/2H <sub>2</sub> | → | Mn <sub>4</sub> N | + | NH <sub>3</sub> | $\Delta_r H^\circ$<br>(kJ mol <sup>-1</sup> ) | $\Delta_r S^\circ$<br>(J mol <sup>-1</sup> K <sup>-1</sup> ) |
|-----------------------------------------------------|--------------------|---|-------------------|---|-------------------|---|-----------------|-----------------------------------------------|--------------------------------------------------------------|
| $\Delta_f H^\circ$<br>(kJ mol <sup>-1</sup> )       | -93                |   | 0                 |   | -128.7            |   | -45.9           | 11.4                                          | ---                                                          |
| $S^\circ$<br>(J mol <sup>-1</sup> K <sup>-1</sup> ) | ---                |   | 130.7             |   | 0                 |   | 192.8           | ---                                           | -3.25                                                        |



## References

1. W. Gao, J. Guo, P. Wang, Q. Wang, F. Chang, Q. Pei, W. Zhang, L. Liu and P. Chen, *Nat. Energy*, 2018, **3**, 1067-1075.
2. P. Chen, Z. Xiong, J. Luo, J. Lin and K. L. Tan, *Nature*, 2002, **420**, 302-304.
3. A. P. Altshuller, *J. Chem. Phys.*, 1955, **23**, 1561-1562.
4. NIST Standard Reference Database Number 69. National Institute of Standards and Technology (2017) <https://webbook.nist.gov/chemistry/>.
